# Supplementary material for: Predicting disease-related genes using integrated biomedical networks
Source: PubMed Central journal article supplement (PMC5310285; doi:10.1186/s12864-016-3263-4), 2017-01-25

Additional File 1: Process of mapping different types of IDs

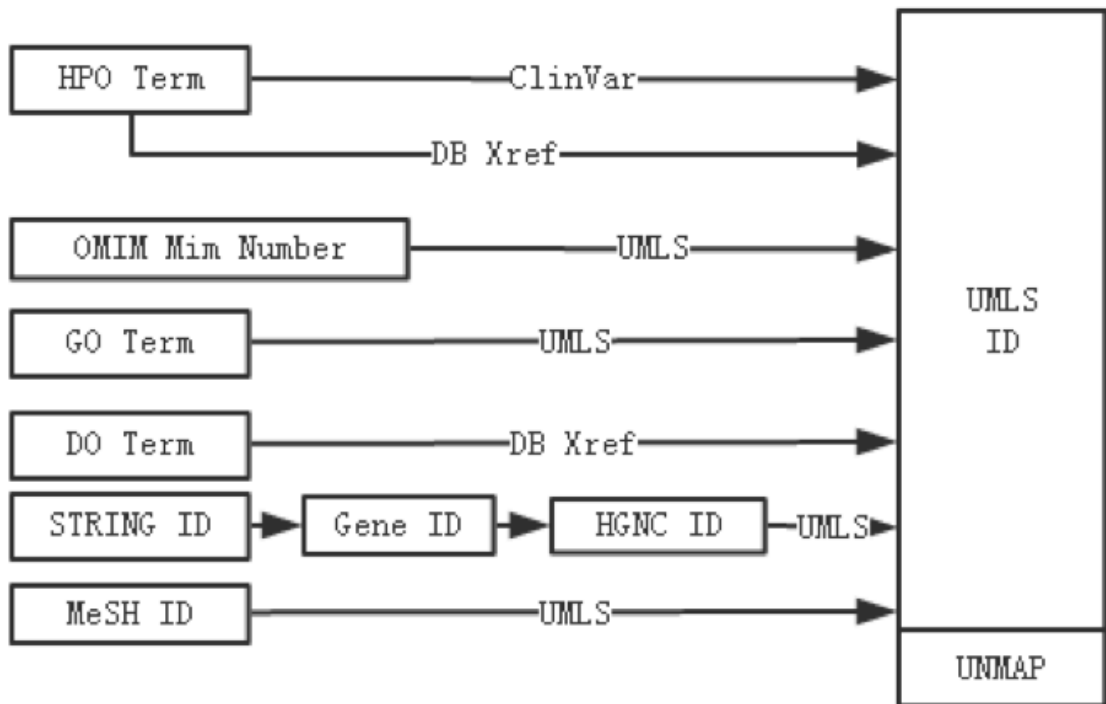

Supplement: 12864_2016_3263_MOESM1_ESM.pdf [file 12864_2016_3263_MOESM1_ESM.pdf]
