# Supplementary material for: Predicting disease-related genes using integrated biomedical networks
Source: PubMed Central journal article supplement (PMC5310285; doi:10.1186/s12864-016-3263-4), 2017-01-25
Supplement: 12864_2016_3263_MOESM2_ESM.pdf [file 12864_2016_3263_MOESM2_ESM.pdf]

Additional file 2: Initial weight for different evidence codes

| Data source | Evidence code            | Abr. Of Evidence code  | Number | Initial weight   |
|-------------|--------------------------|------------------------|--------|------------------|
| SIDD,CTD    | do_sidd_mesh_gene_MFR    | DMR                    | 17072  | 0.8              |
|             | do_sidd_mesh_gene_MFS    | DMS                    | 1097   | 0.8              |
|             | do_sidd_mesh_gene_MFI    | DMI                    | 3756   | 0.6              |
| SIDD,OMIM   | do_sidd_omim_gene_MFR    | DOR                    | 1872   | 0.8              |
|             | do_sidd_omim_gene_MFS    | DOS                    | 257    | 0.8              |
|             | do_sidd_omim_gene_MFI    | DOI                    | 2472   | 0.6              |
| OMIM        | do_xref_omim_gene        | DXM                    | 666    | 1.0              |
| ClinVar     | disease_clinvar_gene     | DVG                    | 21167  | 0.8              |
| CTD         | disease_ctd_gene_curated | DCG                    | 3559   | 0.8              |
| STRING      | string_gene              | SGG                    | 102962 | Weight in STRING |
| GOA         | go_annotation_gene_EXP   | GEXP                   | 221    | 1.0              |
|             | go_annotation_gene_IDA   | GIDA                   | 55469  | 1.0              |
|             | go_annotation_gene_IPI   | GIPI                   | 12604  | 1.0              |
|             | go_annotation_gene_IMP   | GIMP                   | 13781  | 1.0              |
|             | go_annotation_gene_IGI   | GIGI                   | 679    | 1.0              |
|             | go_annotation_gene_IEP   | GIEP                   | 929    | 1.0              |
|             | go_annotation_gene_IEA   | GIEA                   | 79772  | 0.4              |
|             | go_annotation_gene_ND    | GND                    | 1892   | 0.4              |
|             | go_annotation_gene_IC    | GIC                    | 1235   | 0.6              |
|             | go_annotation_gene_NAS   | GNAS                   | 6935   | 0.6              |
|             | go_annotation_gene_TAS   | GTAS                   | 47951  | 0.8              |
|             | go_annotation_gene_IKR   | GIKR                   | 29     | 0.6              |
|             | go_annotation_gene_IRD   | GIRD                   | 2      | 0.6              |
|             | go_annotation_gene_IBA   | GIBA                   | 13559  | 0.6              |
|             | go_annotation_gene_ISS   | GISS                   | 17573  | 0.6              |
|             | HPO                      | hp_annotation_gene_IEA | HIEA   | 2637             |
| OMIM        | hp_annotation_gene_ICE   | HICE                   | 1      | 0.8              |
|             | hp_annotation_gene_PCS   | HPCS                   | 105    | 0.8              |
|             | hp_annotation_gene_TAS   | HTAS                   | 1500   | 0.8              |
| GO          | go_is_a                  | GOA                    | 72459  | 1.0              |
|             | go_part_of               | GOP                    | 8527   | 0.8              |
|             | go_regulates             | GOR                    | 3208   | 0.6              |
| DO          | do_is_a                  | DOA                    | 6919   | 1.0              |
| HP          | hp_is_a                  | HPA                    | 14762  | 1.0              |
