# Supplementary material for: Predicting disease-related genes using integrated biomedical networks
Source: PubMed Central journal article supplement (PMC5310285; doi:10.1186/s12864-016-3263-4), 2017-01-25
Supplement: 12864_2016_3263_MOESM4_ESM.pdf [file 12864_2016_3263_MOESM4_ESM.pdf]

Additional file 4: Diseases selected as the evaluation set

| Disease name                | ID        | Ontology ID              | Number of genes associated with disease |
|-----------------------------|-----------|--------------------------|-----------------------------------------|
| Aneima                      | C0002871  | DOID:2355                | 23                                      |
| Hemolytic anemia            | C0002878  | DOID:583,HP:0001878      | 14                                      |
| Cardiomyopathies            | C0878544  | HP:0001638               | 46                                      |
| Charcot-Marie-Tooth Disease | C0007959  | DOID:10595               | 21                                      |
| Diabetes                    | C0011849  | DOID:9351                | 20                                      |
| Dystonia                    | C0013421  | HP:0001332               | 13                                      |
| Leukemia                    | C0023418  | DOID:1240,<br>HP:0001909 | 32                                      |
| Lymphoma                    | C0024299  | HP:0002665               | 17                                      |
| Muscular Dystrophy          | C0026850  | DOID:9884,<br>HP:0003560 | 9                                       |
| Myopathy                    | C0026848  | DOID:423, HP:0003198     | 27                                      |
| Parkinson Disease           | C0030567  | DOID:14330               | 72                                      |
| Retinitis Pigmentosa        | C0035334  | HP:0000510               | 67                                      |
| Spastic Paraplegia          | C0037773  | DOID:2476                | 35                                      |
| Usher Syndromes             | NMAP12546 | DOID:0050439             | 12                                      |
| Xeroderma Pigmentosum       | NMAP12777 | DOID:0050427             | 8                                       |
| Zellweger Syndrome          | C0043459  | DOID:905                 | 14                                      |
